# Supplementary material
Source: MDPI journal article supplement (https://www.mdpi.com/2071-1050/15/23/16225)
Supplement: s1 [file s1]

# **Consumers' Motives on Wine Tourism in Greece in the Post COVID-19 Era**

**Athanasios Santorinaios, Ioanna S. Kosma and Dimitris Skalkos \***

Laboratory of Food Chemistry, Department of Chemistry, University of Ioannina, 45110 Ioannina, Greece; ch06054@uoi.gr (A.S.); i.kosma@uoi.gr (I.S.K.)

\* Correspondence: dskalkos@uoi.gr; Tel.: +30-2651008345

**Supplementary material**

**Table S1.** Questionnaire about wine tourism in Greece and its prospects of sustainable development on the post-pandemic period.

**I. Demographics**

| <b>1. Gender</b> |
|------------------|
| Male             |
| Female           |

| <b>2. Age</b> |
|---------------|
| 18-25         |
| 26-35         |
| 36-45         |
| 46-55         |
| 56+           |

| <b>3. Education level</b> |
|---------------------------|
| None / Primary School     |
| Secondary School          |
| High School               |
| University                |

| <b>4. Professional status</b> |
|-------------------------------|
| Unemployed                    |
| Student                       |
| Employed                      |
| Retired                       |

| <b>5. In which region of Greece do you have your permanent residence?</b> |
|---------------------------------------------------------------------------|
| North Greece (Macedonia, Thrace)                                          |
| West Greece (Epirus, Etoloakarnania)                                      |
| Central Greece (and Athens)                                               |
| South Greece (Peloponnese)                                                |
| Islands (Aegean, Ionian, Crete)                                           |

Select your answers with an X in the box

**II. Wine consumption habits.**

| <b>1. How many BOTTLES OF WINE do you buy every month TODAY</b> | <b>Mark ONE answer ONLY</b> |                          |
|-----------------------------------------------------------------|-----------------------------|--------------------------|
| 1 – 5 bottles                                                   | <input type="checkbox"/>    | <input type="checkbox"/> |

|                                                                              |                          |  |                          |
|------------------------------------------------------------------------------|--------------------------|--|--------------------------|
| 6-10 bottles                                                                 |                          |  |                          |
| 11 – 15 bottles                                                              |                          |  |                          |
| >15 bottles                                                                  |                          |  |                          |
| Zero (0) bottles per month (I don't buy any wine)                            |                          |  |                          |
| <b>2. How much MONEY do you spend TODAY EVERY MONTH on WINE</b>              | Mark ONE answer ONLY     |  |                          |
| Up to 10 euros                                                               |                          |  |                          |
| 10 – 50 euros                                                                |                          |  |                          |
| 50-100 euros                                                                 |                          |  |                          |
| Over 100 euros                                                               |                          |  |                          |
| <b>3. How often do you consume WINE?</b>                                     | Mark ONE answer ONLY     |  |                          |
| Every day                                                                    |                          |  |                          |
| Once a week                                                                  |                          |  |                          |
| Twice a week                                                                 |                          |  |                          |
| Once every two weeks                                                         |                          |  |                          |
| Once a month                                                                 |                          |  |                          |
| <b>4. Do you consume MORE or LESS wine TODAY than BEFORE the coronavirus</b> | Mark ONE answer ONLY     |  |                          |
|                                                                              | More                     |  | Less                     |
|                                                                              | <input type="checkbox"/> |  | <input type="checkbox"/> |

### III. Previous wine tourism experience.

|                                                                                                                                       |                             |  |  |
|---------------------------------------------------------------------------------------------------------------------------------------|-----------------------------|--|--|
| <b>1. Have you ever visited a WINERY?</b>                                                                                             | Mark ONE answer ONLY        |  |  |
| Yes                                                                                                                                   |                             |  |  |
| No                                                                                                                                    |                             |  |  |
| <b>2. If you answered YES to the first question, how many visits in the past?</b>                                                     | Mark ONE answer ONLY        |  |  |
| 1 visit                                                                                                                               |                             |  |  |
| 2-3 visits                                                                                                                            |                             |  |  |
| 4-5 visits                                                                                                                            |                             |  |  |
| More than 5 visits                                                                                                                    |                             |  |  |
| <b>3. If you answered YES to the first question, did any of your visits include a stay at the winery?</b>                             | Mark ONE answer ONLY        |  |  |
| Yes                                                                                                                                   |                             |  |  |
| No                                                                                                                                    |                             |  |  |
| <b>4. If you answered YES to the first question, select the oenological activities you did during your visit to a winery</b>          | Mark ALL answers that apply |  |  |
| Wine tasting                                                                                                                          |                             |  |  |
| Buy wine at a discounted price                                                                                                        |                             |  |  |
| Buy oenological literature                                                                                                            |                             |  |  |
| Open discussion about wine                                                                                                            |                             |  |  |
| Watch educational presentations                                                                                                       |                             |  |  |
| Dinner                                                                                                                                |                             |  |  |
| Tour without a guide                                                                                                                  |                             |  |  |
| Art exhibition at the winery                                                                                                          |                             |  |  |
| Try / Buy local area products                                                                                                         |                             |  |  |
| Picnic / BBQ                                                                                                                          |                             |  |  |
| <b>5. If you answered YES to the first question, select the tourist activities you did AT THE SAME TIME as your visit to a winery</b> | Mark ALL answers that apply |  |  |
| Visit area's attractions                                                                                                              |                             |  |  |
| Visit parks and recreation areas                                                                                                      |                             |  |  |

|                                             |  |  |  |
|---------------------------------------------|--|--|--|
| Dinner at local restaurants / Fine Dining   |  |  |  |
| Activities in nature / outdoors             |  |  |  |
| Explore the history and culture of the area |  |  |  |
| Visit local market                          |  |  |  |
| Tour of the area WITHOUT a guide            |  |  |  |
| Guided tour of the area                     |  |  |  |

#### IV. Parameters related to the wine and the winery that encouraging the visit to a wine region of Greece.

| 6. About the wine and the winery                                                                  | Not important at all     | Slightly important       | Important                | Quite important          | Very important           |
|---------------------------------------------------------------------------------------------------|--------------------------|--------------------------|--------------------------|--------------------------|--------------------------|
| 1. Range of wineries in one region                                                                | <input type="checkbox"/> |
| 2. Educational opportunities related to wine                                                      | <input type="checkbox"/> |
| 3. Wine/wine tourism festivals and special events                                                 | <input type="checkbox"/> |
| 4. Organized winery tour and local wine tasting                                                   | <input type="checkbox"/> |
| 5. The existence of quality marks such as e.g. PDO (Protected Designation of Origin) product etc. | <input type="checkbox"/> |
| 6. Area grape variety                                                                             | <input type="checkbox"/> |
| 7. Reputation of the wine region and the wine                                                     | <input type="checkbox"/> |
| 8. Cost of visit and wine tasting                                                                 | <input type="checkbox"/> |
| 9. Qualified staff about wine and the oenological region                                          | <input type="checkbox"/> |
| 10. Enrichment of knowledge about wine and grape varieties                                        | <input type="checkbox"/> |

#### V. Parameters related to the regional characteristics encouraging the visit to a wine region of Greece.

| 7. Regarding the general characteristics of the oenological region              | Not important at all     | Slightly important       | Important                | Quite important          | Very important           |
|---------------------------------------------------------------------------------|--------------------------|--------------------------|--------------------------|--------------------------|--------------------------|
| 1. Availability and variety of types of accommodation                           | <input type="checkbox"/> |
| 2. Accessibility (airport, train station, road accessibility)                   | <input type="checkbox"/> |
| 3. Distance from the place of permanent residence                               | <input type="checkbox"/> |
| 4. Personalized and organized holiday program (individual or group)             | <input type="checkbox"/> |
| 5. Opportunity to experience the culture, the history and lifestyle of the area | <input type="checkbox"/> |
| 6. Availability of gourmet cuisine                                              | <input type="checkbox"/> |
| 7. Attractive natural scenery and good climatic conditions                      | <input type="checkbox"/> |
| 8. Participation in social activities                                           | <input type="checkbox"/> |

#### VI. Source of information encouraging the visit to a wine region of Greece.

| 13. SOURCES OF INFORMATION regarding the wine tourism activities of the region | Not important at all |  |  | Slightly important |  |  | Important |  |  | Quite important |  |  | Very important |  |  |
|--------------------------------------------------------------------------------|----------------------|--|--|--------------------|--|--|-----------|--|--|-----------------|--|--|----------------|--|--|
| 1. Brochures                                                                   |                      |  |  |                    |  |  |           |  |  |                 |  |  |                |  |  |
| 2. Recommendation from a familiar person                                       |                      |  |  |                    |  |  |           |  |  |                 |  |  |                |  |  |
| 3. Media (TV, Radio)                                                           |                      |  |  |                    |  |  |           |  |  |                 |  |  |                |  |  |
| 4. Local visitor information centers                                           |                      |  |  |                    |  |  |           |  |  |                 |  |  |                |  |  |
| 5. Travel agencies – group visits                                              |                      |  |  |                    |  |  |           |  |  |                 |  |  |                |  |  |
| 6. Internet / Social Media (Facebook, Instagram, TikTok) etc.                  |                      |  |  |                    |  |  |           |  |  |                 |  |  |                |  |  |

**Table S2.** Associations between consumption habits on wine and demographic variables.

| Question                                                                     | Gender          |                               |                  | Age            |                 |       | Level of education<br>(completed) |                 |       | Job situation  |                 |       | Permanent residence in<br>Greece |                 |       |
|------------------------------------------------------------------------------|-----------------|-------------------------------|------------------|----------------|-----------------|-------|-----------------------------------|-----------------|-------|----------------|-----------------|-------|----------------------------------|-----------------|-------|
|                                                                              | X <sup>2*</sup> | V <sup>**</sup><br>(Cramer's) | p <sup>***</sup> | X <sup>2</sup> | V<br>(Cramer's) | p     | X <sup>2</sup>                    | V<br>(Cramer's) | p     | X <sup>2</sup> | V<br>(Cramer's) | p     | X <sup>2</sup>                   | V<br>(Cramer's) | p     |
| How many bottles of wine do you buy per month TODAY?                         |                 |                               |                  | 42.956         | 0.134           | 0.000 | 57.232                            | 0.179           | 0.000 | 54.572         | 0.175           | 0.000 |                                  |                 |       |
| How much money do you spend on wine per month TODAY?                         | 10.679          | 0.134                         | 0.014            | 46.061         | 0.161           | 0.000 | 26.834                            | 0.123           | 0.001 | 34.824         | 0.140           | 0.001 |                                  |                 |       |
| How often do you consume wine?                                               |                 |                               |                  | 57.318         | 0.155           | 0.000 | 23.823                            | 0.116           | 0.021 | 48.924         | 0.166           | 0.000 |                                  |                 |       |
| Do you consumer LESS or MORE wine today compared to the pre-pandemic period? |                 |                               |                  | 34.243         | 0.240           | 0.000 | 19.981                            | 0.183           | 0.000 | 25.657         | 0.208           | 0.000 | 12.151                           | 0.143           | 0.016 |

\* chi-square test, \*\* Cramer's or Phi coefficient, \*\*\*level of significance of 5%: p < 0.05.

**Table S3.** Associations between participants' previous wine tourism experience and demographic values.

| Question                                                               | Gender           |                   |       | Age            |                 |       | Level of education<br>(completed) |                 |       | Job situation  |                 |       | Permanent residence in<br>Greece |                 |   |
|------------------------------------------------------------------------|------------------|-------------------|-------|----------------|-----------------|-------|-----------------------------------|-----------------|-------|----------------|-----------------|-------|----------------------------------|-----------------|---|
|                                                                        | X <sup>2</sup> * | V**<br>(Cramer's) | p***  | X <sup>2</sup> | V<br>(Cramer's) | p     | X <sup>2</sup>                    | V<br>(Cramer's) | p     | X <sup>2</sup> | V<br>(Cramer's) | p     | X <sup>2</sup>                   | V<br>(Cramer's) | p |
| Have you ever visited a winery?                                        |                  |                   |       | 41.037         | 0.263           | 0.000 | 13.302                            | 0.150           | 0.004 | 31.990         | 0.232           | 0.000 |                                  |                 |   |
| How many visits in the past?                                           |                  |                   |       | 51.788         | 0.220           | 0.001 | 17.879                            | 0.158           | 0.007 | 36.071         | 0.184           | 0.000 |                                  |                 |   |
| Wine tourism activities while visiting: Wine tasting                   | 5.259            | 0.094             | 0.022 | 79.062         | 0.365           | 0.000 | 20.560                            | 0.186           | 0.000 | 71.428         | 0.347           | 0.000 |                                  |                 |   |
| Wine tourism activities while visiting: Buy wine at a discounted price | 8.618            | 0.120             | 0.003 | 89.814         | 0.389           | 0.001 | 29.468                            | 0.223           | 0.000 | 60.849         | 0.320           | 0.001 |                                  |                 |   |
| Wine tourism activities while                                          |                  |                   |       | 9.604          | 0.127           | 0.048 |                                   |                 |       |                |                 |       |                                  |                 |   |

|                                                                                              |        |       |       |        |       |       |        |       |       |        |
|----------------------------------------------------------------------------------------------|--------|-------|-------|--------|-------|-------|--------|-------|-------|--------|
| visiting: Buy<br>oenological<br>literature                                                   |        |       |       |        |       |       |        |       |       |        |
| Wine<br>tourism<br>activities<br>while<br>visiting:<br>Open<br>discussion<br>about wine      |        |       |       |        |       |       | 14.848 | 0.158 | 0.002 |        |
| Wine<br>tourism<br>activities<br>while<br>visiting:<br>Watch<br>educational<br>presentations |        |       |       |        |       |       | 10.362 | 0.132 | 0.016 | 13.998 |
| Wine<br>tourism<br>activities<br>while<br>visiting:<br>Dinner                                | 34.957 | 0.243 | 0.000 | 12.633 | 0.146 | 0.005 | 35.340 | 0.244 | 0.000 | 0.154  |
| Wine<br>tourism<br>activities<br>while<br>visiting:<br>Tour without<br>a guide               | 20.489 | 0.186 | 0.000 |        |       |       | 17.242 | 0.170 | 0.001 | 0.007  |



|                                                                                            |       |       |       |        |       |       |        |       |       |        |        |       |       |
|--------------------------------------------------------------------------------------------|-------|-------|-------|--------|-------|-------|--------|-------|-------|--------|--------|-------|-------|
| Wine<br>tourism<br>activities<br>while<br>visiting: Try /<br>Buy local<br>area<br>products |       |       |       | 32.140 | 0.233 | 0.000 |        |       |       | 23.373 | 0.198  | 0.000 |       |
| Wine<br>tourism<br>activities<br>while<br>visiting:<br>Picnic / BBQ                        | 6.960 | 0.108 | 0.008 | 23.295 | 0.198 | 0.000 |        |       |       | 23.709 | 0.200  | 0.000 |       |
| Tourism<br>activities<br>while<br>visiting: Visit<br>area's<br>attractions                 |       |       |       | 51.302 | 0.294 | 0.000 | 11.068 | 0.137 | 0.011 | 33.380 | 0.237  | 0.000 |       |
| Tourism<br>activities<br>while<br>visiting: Visit<br>parks and<br>recreation<br>areas      |       |       |       |        |       |       |        |       |       |        | 12.323 | 0.144 | 0.015 |
| Tourism<br>activities<br>while<br>visiting:<br>Dinner at<br>local                          | 7.537 | 0.113 | 0.006 | 39.625 | 0.258 | 0.000 | 14.831 | 0.158 | 0.002 | 29.074 | 0.221  | 0.000 |       |

restaurants /  
Fine Dining

|                                                                     |        |       |       |        |       |       |        |       |       |
|---------------------------------------------------------------------|--------|-------|-------|--------|-------|-------|--------|-------|-------|
| Tourism activities while visiting: Activities in nature / outdoors  |        |       |       |        |       |       | 8.205  | 0.118 | 0.042 |
| Tourism activities while visiting: Visit local market               | 53.084 | 0.299 | 0.000 | 13.121 | 0.149 | 0.004 | 40.300 | 0.260 | 0.000 |
| Tourism activities while visiting: Tour of the area WITHOUT a guide | 31.672 | 0.231 | 0.000 | 10.822 | 0.135 | 0.013 | 31.597 | 0.231 | 0.000 |

\* chi-square test, \*\* Cramer's or Phi coefficient, \*\*\*level of significance of 5%:  $p < 0.05$ .

**Table S4.** Associations between respondents' answers on parameters regarding the wine and the winery and their demographic variables.

| Question/<br>Parameter                         | Gender          |                   |       | Age            |                 |       | Level of education<br>(completed) |                 |       | Job situation  |                 |   | Permanent residence in<br>Greece |                 |       |
|------------------------------------------------|-----------------|-------------------|-------|----------------|-----------------|-------|-----------------------------------|-----------------|-------|----------------|-----------------|---|----------------------------------|-----------------|-------|
|                                                | X <sup>2*</sup> | V**<br>(Cramer's) | P***  | X <sup>2</sup> | V<br>(Cramer's) | P     | X <sup>2</sup>                    | V<br>(Cramer's) | P     | X <sup>2</sup> | V<br>(Cramer's) | P | X <sup>2</sup>                   | V<br>(Cramer's) | P     |
| Range of wineries in one region                | 10.824          | 0.135             | 0.029 | 38.843         | 0.128           | 0.001 |                                   |                 |       |                |                 |   | 30.355                           | 0.113           | 0.016 |
| Wine/wine tourism festivals and special events |                 |                   |       |                |                 |       | 27.128                            | 0.123           | 0.007 |                |                 |   | 28.111                           | 0.109           | 0.031 |
| Organized winery tour and local wine tasting   |                 |                   |       | 34.562         | 0.121           | 0.005 |                                   |                 |       |                |                 |   |                                  |                 |       |
| Area grape variety                             | 15.680          | 0.163             | 0.003 |                |                 |       |                                   |                 |       |                |                 |   |                                  |                 |       |

\* chi-square test, \*\* Cramer's or Phi coefficient, \*\*\*level of significance of 5%: p < 0.05.

**Table S5.** Associations between parameters regarding the general characteristics of the wine region to encourage participation in wine tourism activities in Greece and the demographic characteristics.

| Question/<br>Parameter                                                                      | Gender     |                   |       | Age      |                 |       | Level of education<br>(completed) |                 |       | Job situation |                 |       | Permanent residence<br>in Greece |                 |   |
|---------------------------------------------------------------------------------------------|------------|-------------------|-------|----------|-----------------|-------|-----------------------------------|-----------------|-------|---------------|-----------------|-------|----------------------------------|-----------------|---|
|                                                                                             | $\chi^2$ * | V**<br>(Cramer's) | p***  | $\chi^2$ | V<br>(Cramer's) | p     | $\chi^2$                          | V<br>(Cramer's) | p     | $\chi^2$      | V<br>(Cramer's) | p     | $\chi^2$                         | V<br>(Cramer's) | p |
| Availability and<br>variety of types<br>of<br>accommodation                                 |            |                   |       | 31.788   | 0.116           | 0.011 |                                   |                 |       | 35.732        | 0.141           | 0.000 |                                  |                 |   |
| Personalized and<br>organized<br>holiday program<br>(individual or<br>group)                |            |                   |       |          |                 |       |                                   |                 |       | 21.906        | 0.111           | 0.039 |                                  |                 |   |
| Opportunity to<br>experience the<br>culture, the<br>history and<br>lifestyle of the<br>area | 10.827     | 0.135             | 0.029 |          |                 |       | 68.778                            | 0.196           | 0.000 |               |                 |       |                                  |                 |   |
| Availability of<br>gourmet cuisine                                                          | 10.508     | 0.133             | 0.033 | 32.797   | 0.117           | 0.008 | 27.741                            | 0.125           | 0.006 | 39.632        | 0.149           | 0.000 |                                  |                 |   |
| Participation in<br>social activities                                                       | 19.974     | 0.183             | 0.001 |          |                 |       | 38.488                            | 0.147           | 0.000 |               |                 |       |                                  |                 |   |

\* chi-square test, \*\* Cramer's or Phi coefficient, \*\*\*level of significance of 5%:  $p < 0.05$ .

**Table S6.** Associations between preference on source of information regarding wine tourism activities in Greece and demographic characteristics.

| Question/ Source of Information     | Gender          |                   |       | Age            |                 |       | Level of education (completed) |                 |       | Job situation  |                 |       | Permanent residence in Greece |                 |       |
|-------------------------------------|-----------------|-------------------|-------|----------------|-----------------|-------|--------------------------------|-----------------|-------|----------------|-----------------|-------|-------------------------------|-----------------|-------|
|                                     | X <sup>2*</sup> | V**<br>(Cramer's) | p***  | X <sup>2</sup> | V<br>(Cramer's) | p     | X <sup>2</sup>                 | V<br>(Cramer's) | p     | X <sup>2</sup> | V<br>(Cramer's) | p     | X <sup>2</sup>                | V<br>(Cramer's) | p     |
| Brochures                           |                 |                   |       | 39.980         | 0.130           | 0.001 | 27.154                         | 0.123           | 0.007 | 27.442         | 0.124           | 0.007 | 26.428                        | 0.105           | 0.048 |
| Recommendation from a family member |                 |                   |       |                |                 |       |                                |                 |       |                |                 |       | 30.145                        | 0.113           | 0.017 |
| Media (TV, Radio)                   |                 |                   |       |                |                 |       | 21.076                         | 0.109           | 0.049 | 22.975         | 0.113           | 0.028 | 28.061                        | 0.109           | 0.031 |
| Local visitor information centers   |                 |                   |       |                |                 |       | 22.988                         | 0.113           | 0.028 | 21.624         | 0.110           | 0.042 | 37.279                        | 0.125           | 0.002 |
| Travel agencies – group visits      | 12.754          | 0.146             | 0.013 |                |                 |       |                                |                 |       |                |                 |       | 26.346                        | 0.105           | 0.049 |
| Internet / Social Media             | 12.155          | 0.143             | 0.016 |                |                 |       | 42.591                         | 0.154           | 0.000 |                |                 |       | 32.327                        | 0.117           | 0.009 |

(Faceb  
ook,  
Instagr  
am,  
TikTok  
) etc.

---

\* chi-square test, \*\* Cramer's or Phi coefficient, \*\*\*level of significance of 5%:  $p < 0.05$ .
